# Supplementary material
Source: publisher site journal article supplement (https://www.spandidos-publications.com/4552/downloadSupplementary)

Figure S1. HPV detection. (A) Immunocytochemical-based HPV infection status of established cell lines using p16 and E7 antibodies (scale bar=50  $\mu$ m). (B) PCR-based HPV detection in established cell lines using MY09/MY11 primers. Beta actin is being used as the template control. Loading order: C: Negative, No Template Control; C+: HeLa, positive control; 1: MhCT12-E; 2: MhCT12-F; 3: MhCT08-E; and 4: MhCT08-F. HPV, Human Papilloma Virus.

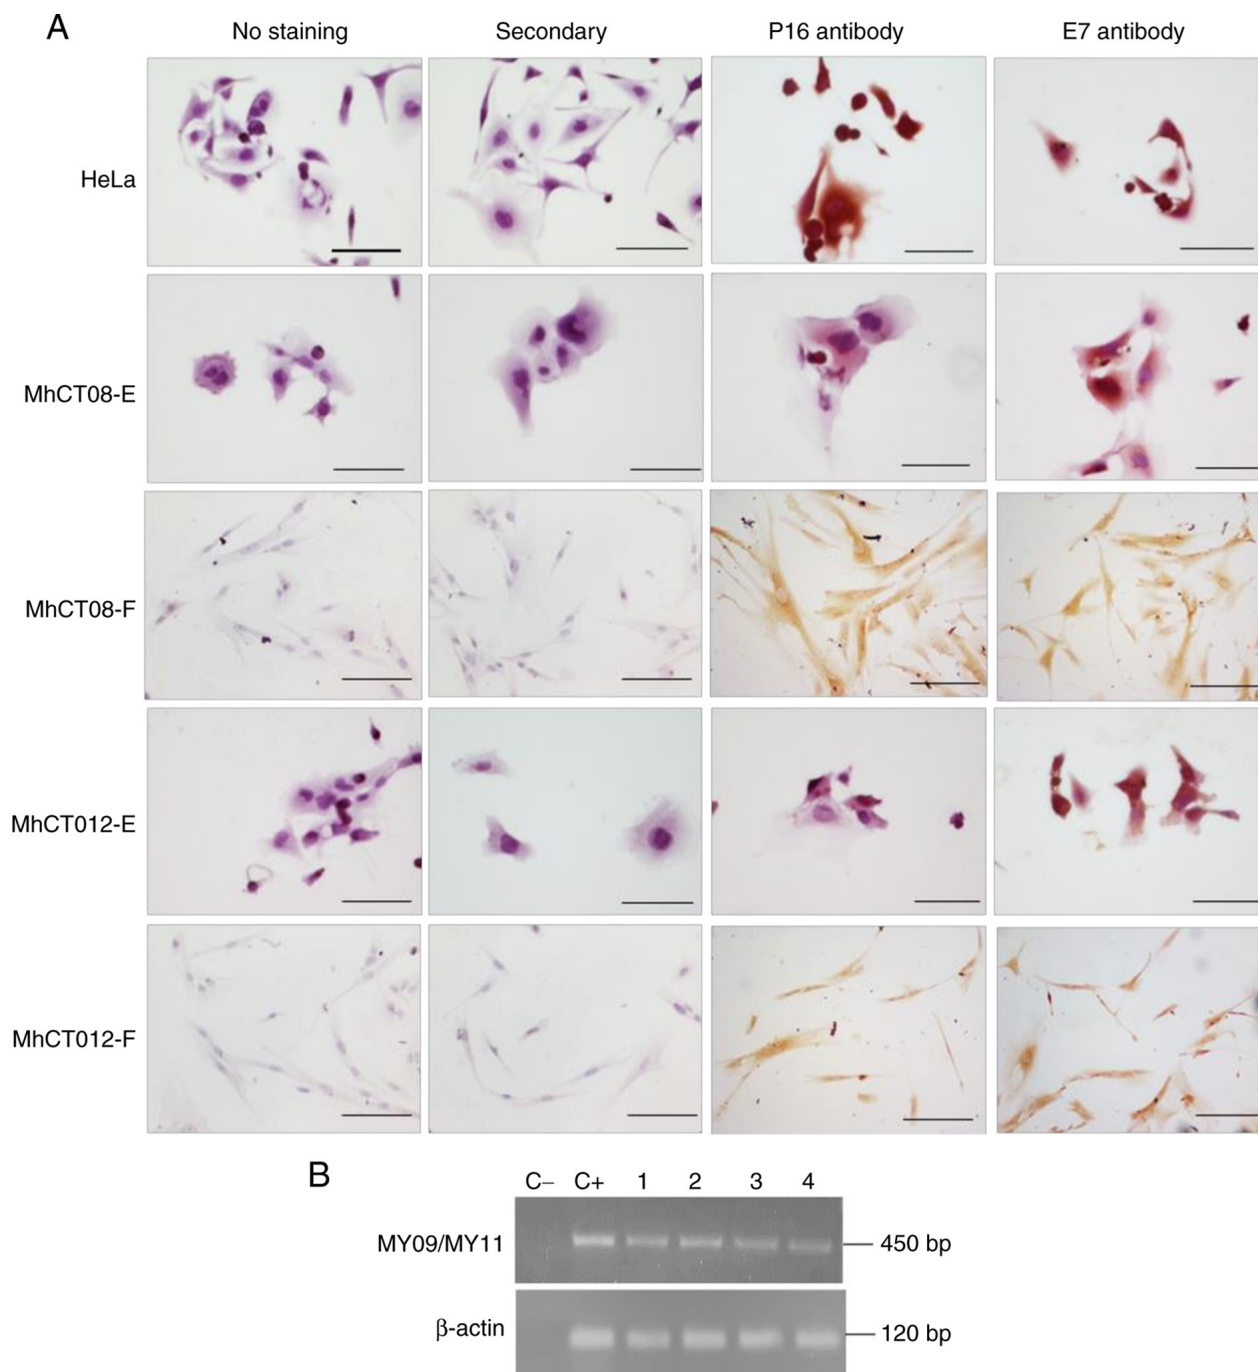

Supplement: Supplementary file 1 [file downloadSupplementary]
